# Supplementary material for: Proton-insertion-pseudocapacitance of tungsten bronze tunnel structure enhanced by transition metal ion anchoring
Source: Royal Society of Chemistry journal article supplement (doi:10.1039/d1nr02384e), 2021-01-01
Supplement: d1nr02384e1.pdf [file d1nr02384e1.pdf]

## Proton-insertion-pseudocapacitance of tungsten bronze tunnel structure enhanced by transition metal ions anchoring

Siwei Zhao<sup>[a]</sup>, Chenlong Dong<sup>[a]</sup>, Fuqiang Huang<sup>\*[a][b]</sup>

<sup>a</sup> Beijing National Laboratory for Molecular Sciences and State Key Laboratory of Rare Earth Materials Chemistry and Applications, College of Chemistry and Molecular Engineering, Peking University, Beijing 100871, P.R. China.

<sup>b</sup> State Key Laboratory of High-Performance Ceramics and Superfine Microstructure, Shanghai Institute of Ceramics, Chinese Academy of Sciences, Shanghai 200050, P.R. China

\* E-mail: huangfq@pku.edu.cn

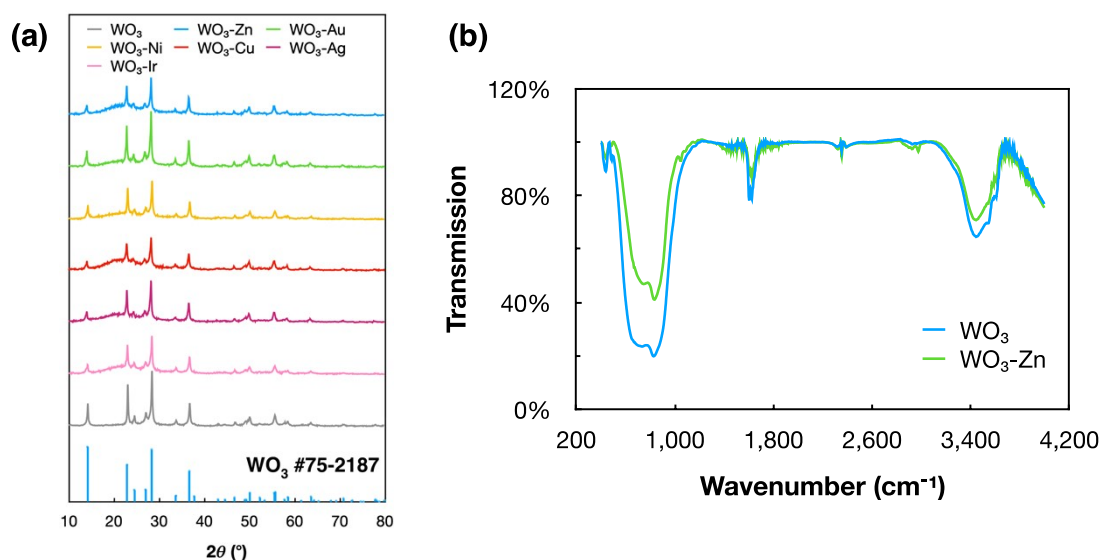

**Figure S1.** (a) XRD results of WO<sub>3</sub> and WO<sub>3</sub>-TM. (b) IR spectra of the as-prepared WO<sub>3</sub> and WO<sub>3</sub>-Zn.

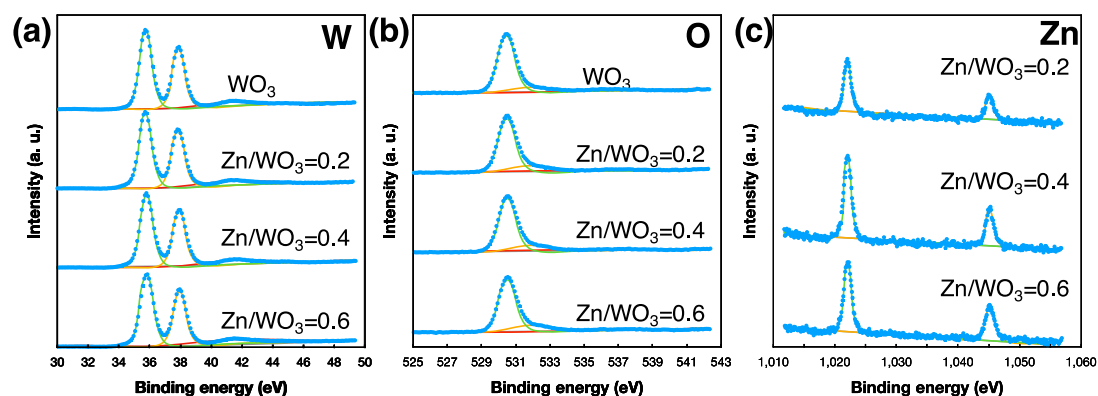

**Figure S2.** XPS of (a) W, (b) O and (c) Zn of WO<sub>3</sub>-Zn with different ratios.

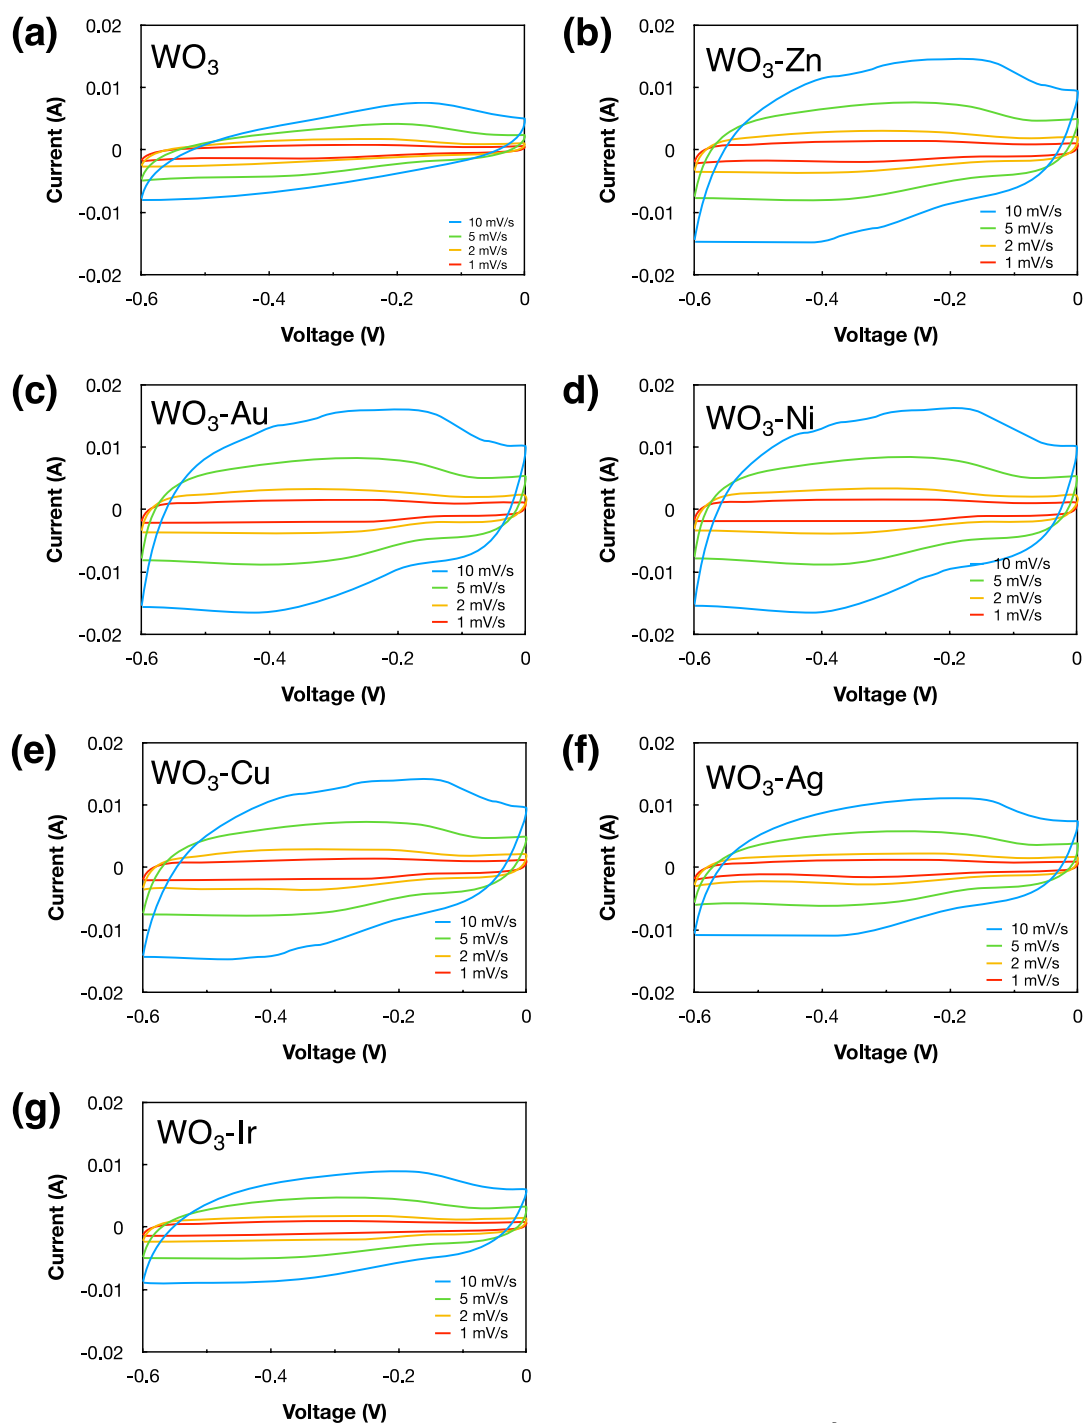

**Figure S3.** (a-g) The CV of  $\text{WO}_3$  and derivatives at different scan rates.

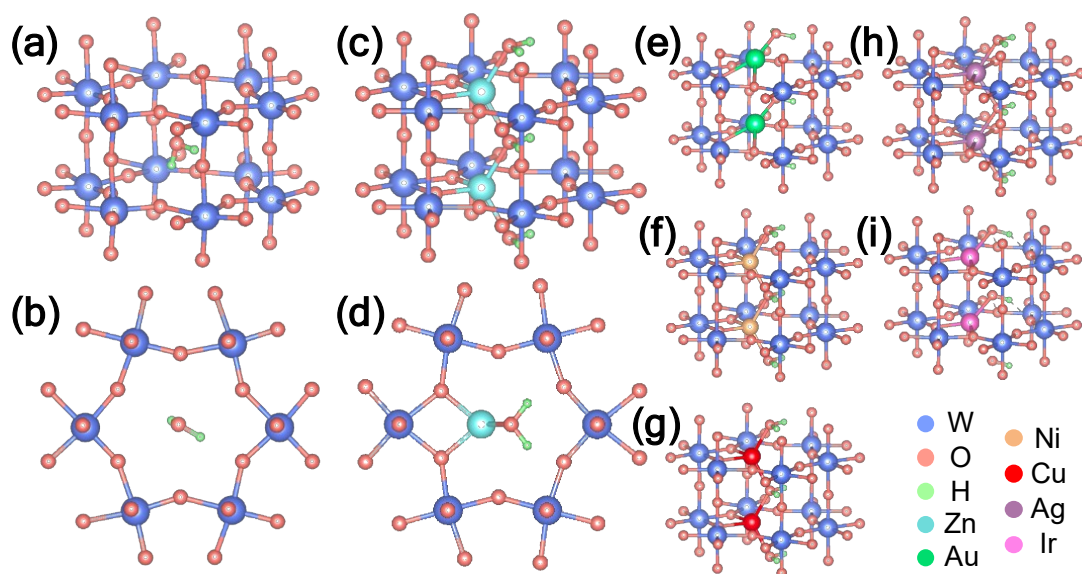

**Figure S4.** Optimized structure of  $\text{WO}_3$  and  $\text{WO}_3\text{-TM}$  with  $\text{H}_2\text{O}$  inside the channel. The ratio of  $\text{WO}_3$ , TM and  $\text{H}_2\text{O}$  is determined by TGA and ICP.

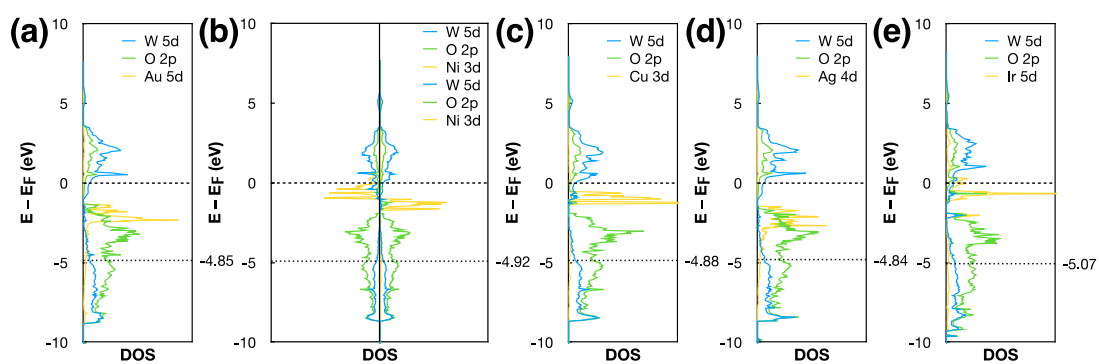

**Figure S5.** DOS of  $\text{WO}_3\text{-TM}$ .

**Table S1.** ICP of  $\text{WO}_3\text{-Zn}$ . The designed ratio is  $\text{Zn}/\text{WO}_3$  in atom during synthesis.

| Samples                       | Designed | ICP  |
|-------------------------------|----------|------|
| $\text{WO}_3\text{-Zn}_{0.2}$ | 0.2      | 0.21 |
| $\text{WO}_3\text{-Zn}_1$     | 1        | 0.41 |
| $\text{WO}_3\text{-Zn}_5$     | 5        | 0.59 |
